# Supplementary material for: Transforming Growth Factor Beta 2 (TGFB2) and Interferon Gamma Receptor 2 (IFNGR2) mRNA Levels in the Brainstem Tumor Microenvironment (TME) Significantly Impact Overall Survival in Pediatric DMG Patients
Source: MDPI journal article supplement (doi:10.3390/biomedicines12010191), 2024-01-15
Supplement: s1 [file s1]

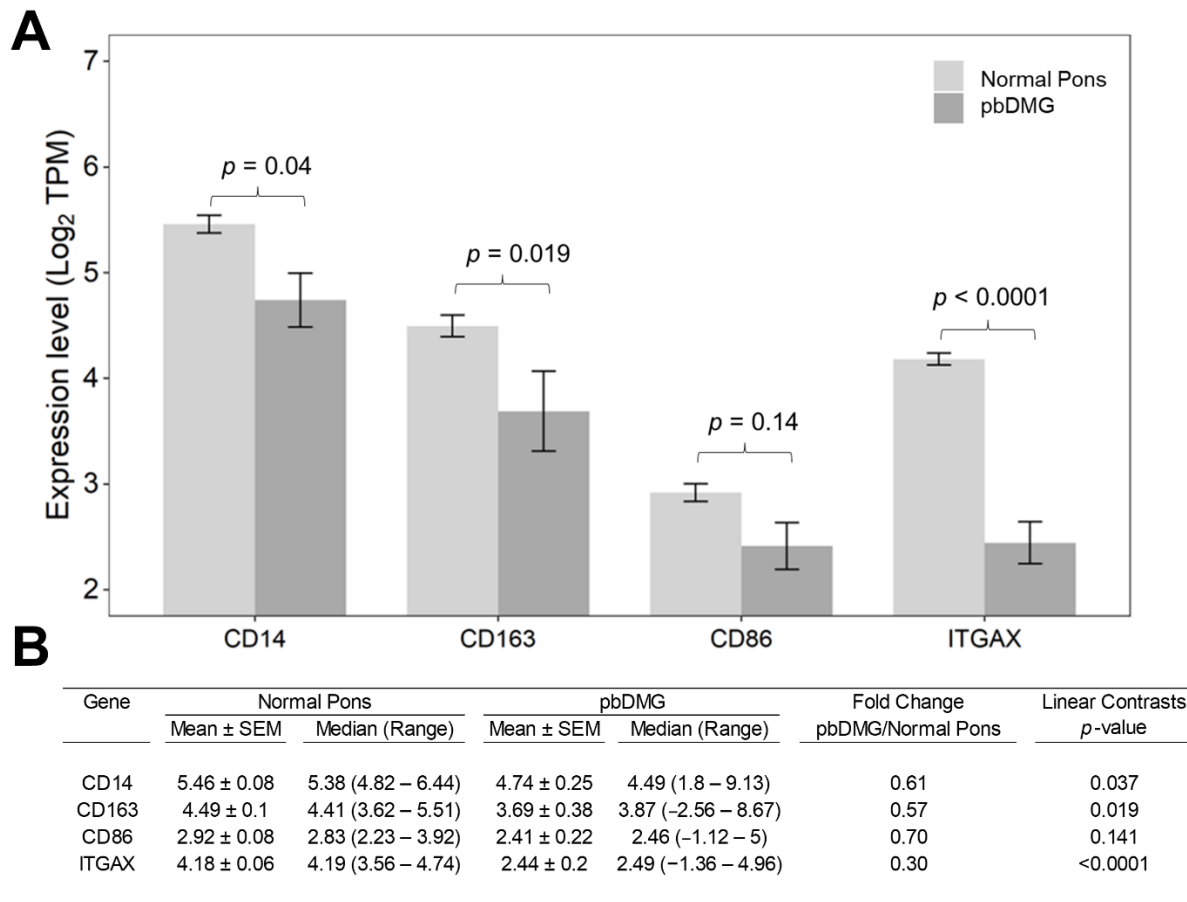

**Figure S1.** Down-regulation of antigen-presenting cell mRNA expression in brainstem/pons of pbDMG tumors compared to normal brainstem/pons tissue.

We compared CD14 ( $n=45$ ), CD163( $n=45$ ), CD86 ( $n=45$ ), and ITGAX ( $n=45$ ) mRNA expression levels (log<sub>2</sub> TPM) in pbDMG samples to the expression in normal pons samples from 29 pons regions (downloaded from <https://www.proteinatlas.org/about/download> accessed 17th December 2022). **[A]** The bar charts illustrate mean expression levels for mRNA in tumor specimens from pbDMG patients (dark grey bars) compared to normal pons samples (light grey bars). **[B]** The statistical significance of differences in mRNA expression levels (in log<sub>2</sub>-transformed TPM values) was assessed using a two-way ANOVA with linear contrasts with gene level blocked design using FDR-adjusted  $p$ -values. Compared to normal brainstem/pons tissue, CD14, CD163, and ITGAX mRNA expression in pbDMG patients had significant decreases of 1.64-fold ( $p=0.037$ ), 1.75-fold ( $p=0.019$ ), and 3.33-fold ( $p<0.0001$ ), respectively. CD86 mRNA expression in DMG patients showed a non-significant 1.42 decrease compared to normal brainstem/pons tissue ( $p=0.14$ ).

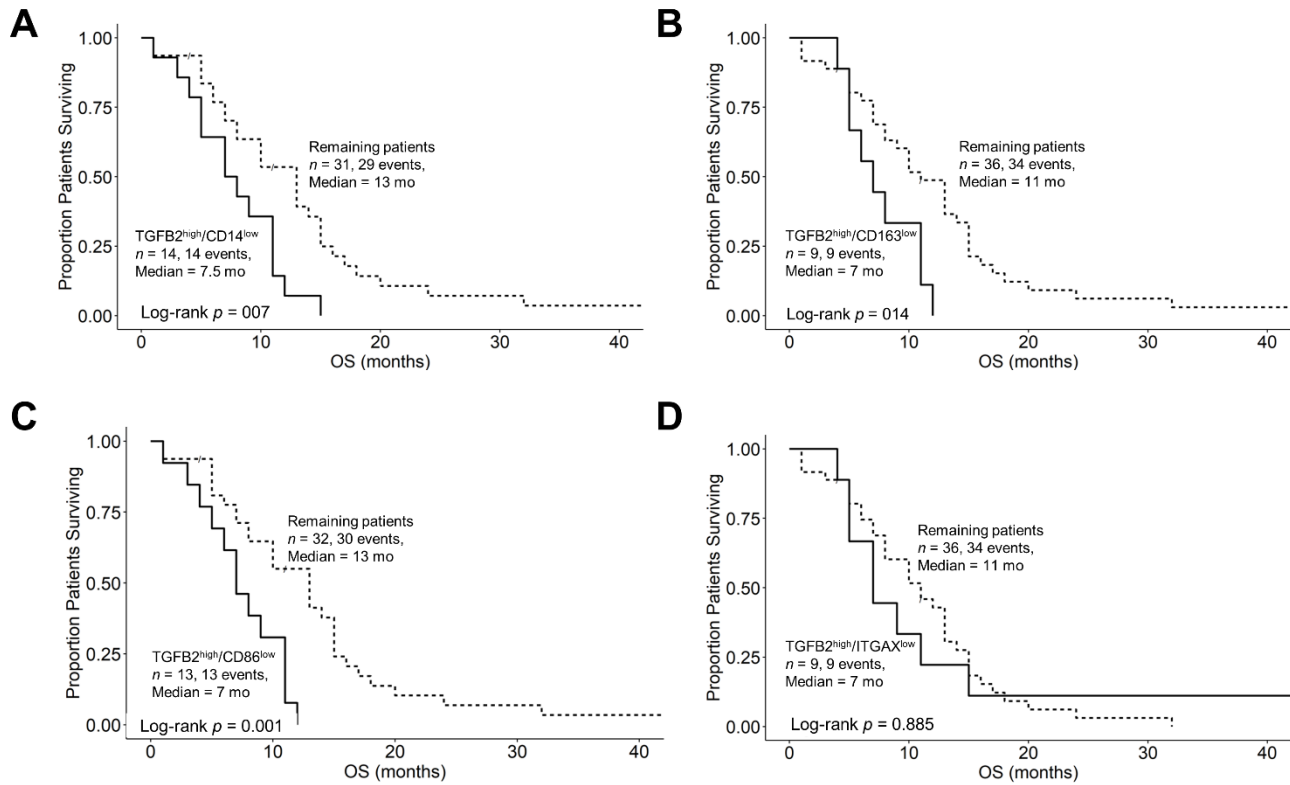

**Figure S2.** pbDMG patients with high levels of TGFB2 and low levels of antigen-presenting cell surface receptor mRNA expression exhibited significantly shorter OS times than the remaining patients.

We downloaded clinical metadata and RNA sequencing-based mRNA expression data for 45 patients diagnosed with pbDMG ([https://pedcbioportal.kidsfirstdrc.org/study/summary?id=openpbta%2Cpbta\\_all](https://pedcbioportal.kidsfirstdrc.org/study/summary?id=openpbta%2Cpbta_all)). The RSEM-determined TPM metric was used to calculate the percentiles of TGFB2 and expression of CD14, CD163, CD86, and ITGAX mRNA in 45 pbDMG patients. Two patient groups were then formed based on their expression levels of TGFB2 and CD14 (A), CD163 (B), CD86 (C), and ITGAX (D), comparing higher than or equal to the 50th percentile of both TGFB2 and lower than 50th percentile for the cell surface markers with remaining patients ( $n=32$ ). OS curves were then compared between these groups to assess the survival impact of the combination of TGFB2 and cell surface receptor levels. [A] The median overall survival time for 14 patients in the TGFB2<sup>high</sup>/CD14<sup>low</sup> group was 7.5 months (95% CI: 5–12, number of events=14) was significantly shorter (Log-rank Chi-square=7.4,  $p$ -value=0.007) compared to the median survival time for 31 remaining patients of 13 months (95% CI: 8–15, number of events=29). [B] The median overall survival time for 9 patients in the TGFB2<sup>high</sup>/CD163<sup>low</sup> group was 7 months (95% CI: 5–NA, number of events = 9) as compared to the median overall survival time for 36 remaining patients of 11 months (95% CI: 8–15, number of events = 34). The difference in survival outcome for these groups was statistically significant (Log-rank Chi-square = 6.06,  $p$ -value = 0.014). [C] The median overall survival time for 13 patients in the TGFB2<sup>high</sup>/CD86<sup>low</sup> was 7 months (95% CI: 5–NA, number of events=13) which was significantly (Log-rank Chi-square=10.5,  $p$ -value=0.001) shorter than the overall survival time for 32 remaining of 13 months (95% CI: 8–15, number of events=30). [D] The median overall survival time for 9 patients in the TGFB2<sup>high</sup>/ITGAX<sup>low</sup> group was 7 months (95% CI: 5–NA, number of events = 9), which was shorter but not statistically significant ( $p=0.885$ ) compared to the median overall survival time for the remaining 36 patients of 11 months (95% CI: 8–14, number of events = 34).

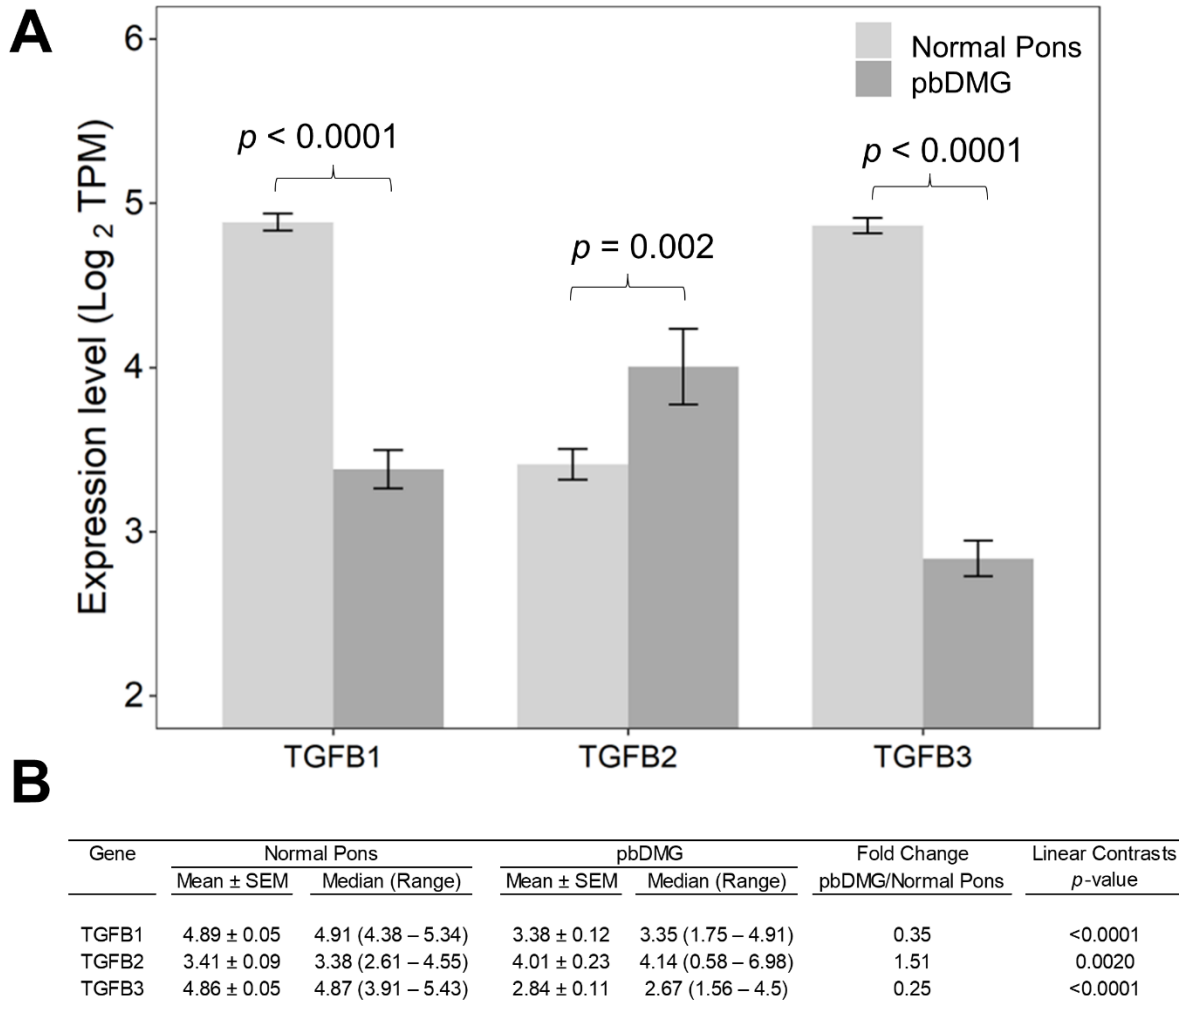

**Figure S3.** Selective upregulation of TGFB2 mRNA expression in pbDMG patients compared to TGFB1 and TGFB3 expression levels.

TGFB1 ( $n=39$ ; mRNA expression values were not recorded for 6 patients), TGFB2 ( $n=45$ ), TGFB3 ( $n=39$ ; mRNA expression values were not recorded for 6 patients) mRNA expression levels (log<sub>2</sub> TPM) in DMG samples were compared the expression in normal pons samples from 29 pons regions (downloaded from <https://www.proteinatlas.org/about/download> accessed 17th December 2022). **[A]** The bar charts illustrate mean expression levels for mRNA in tumor specimens from DMG patients (dark grey bars) compared to normal pons samples (light grey bars). **[B]** The statistical significance of differences in mRNA expression levels (in log<sub>2</sub>-transformed TPM values) was assessed using a two-way ANOVA with linear contrasts using FDR-adjusted *p*-values. A statistical comparison between TGFB1, TGFB2, and TGFB3 expression in DMG compared to normal pons tissue revealed a significant ( $p < 0.0001$ , 0.002, and  $< 0.0001$  respectively) 2.84-fold decrease, 1.51-fold increase and 4.08-fold decrease in TGFB1, TGFB2 and TGFB3 mRNA expression relative to normal pons tissue respectively, suggesting that DMG brainstem tissues selectively upregulate TGFB2 and downregulate TGFB1 and TGFB3. A comparison of TGFB1 and TGFB2 mRNA in normal pons tissue revealed a significant ( $p < 0.0001$ ) 2.78-fold lower expression of TGFB2. This was also observed in the comparison of TGFB2 and TGFB3 mRNA expression that showed a highly significant ( $p < 0.0001$ ) 2.74-fold decrease in mRNA expression for TGFB2. In contrast, in DMG samples, TGFB2 mRNA expression was significantly higher than TGFB1 (1.54-fold increase;  $p = 4.1 \times 10^{-4}$ ) and TGFB3 (2.25-fold increase;  $p < 0.0001$ ), suggesting specific upregulation of the TGFB2 isoform in tumor tissue.

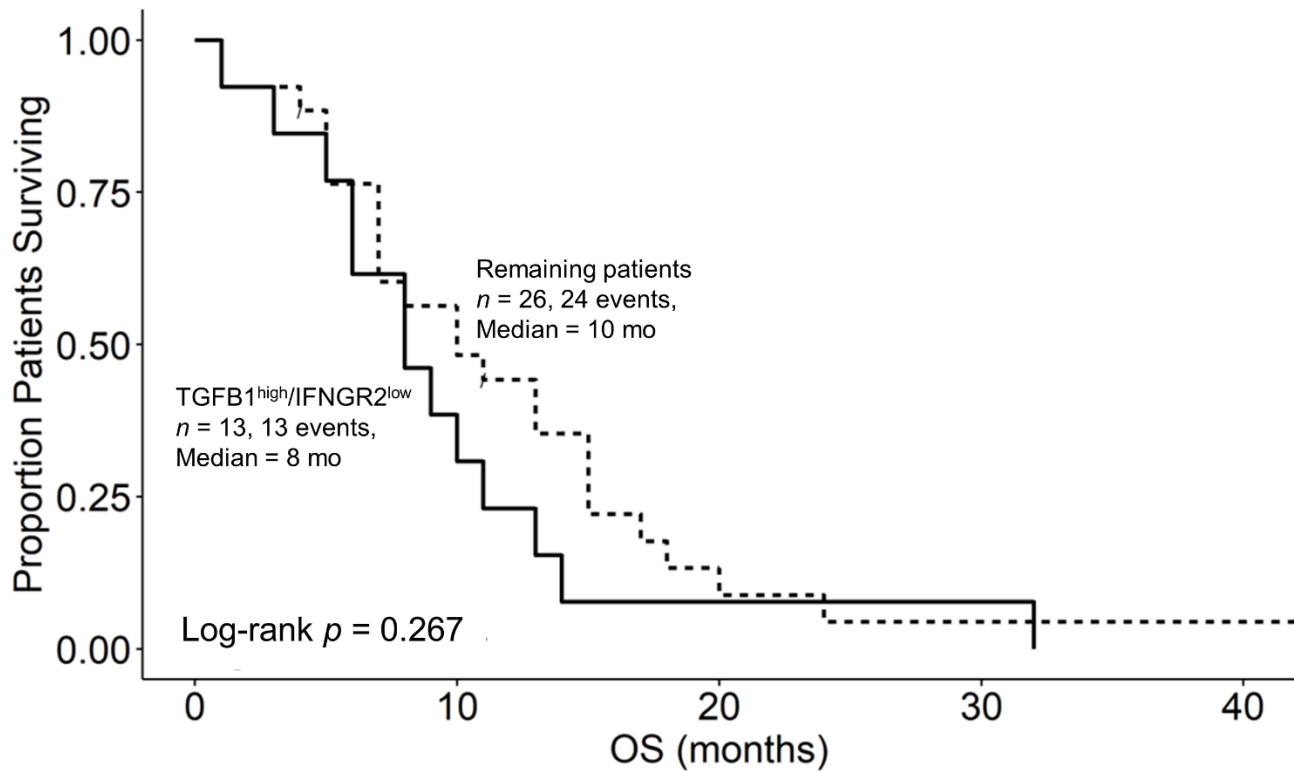

**Figure S4.** pbDMG patients with high levels of TGFB1 and low levels of IFNGR2 mRNA expression impact OS times compared to remaining patients.

We downloaded clinical metadata and RNA sequencing-based mRNA expression data for 39 evaluable patients diagnosed with pbDMG ([https://pedcbioportal.kidsfirstdrc.org/study/summary?id=openpbta%2Cpbta\\_all](https://pedcbioportal.kidsfirstdrc.org/study/summary?id=openpbta%2Cpbta_all)). The RSEM-determined TPM metric was used to calculate the percentiles of TGFB1 and IFNGR2 expression in 39 evaluable pbDMG patients (mRNA expression values were not recorded for 6 patients). Two patient groups were then formed based on their expression levels of TGFB1 and IFNGR2: high expression of TGFB1 mRNA and low expression of IFNGR2 (TGFB1<sup>high</sup>/IFNGR2<sup>low</sup>; higher than or equal to the 50th percentile of both TGFB1 and lower than 50<sup>th</sup> percentile for IFNGR2 ( $n=13$ )); and remaining patients ( $n=26$ ). OS curves were then compared between these groups to assess the survival impact of the combination of TGFB1 and IFNGR2 levels. The median OS time for 13 patients with TGFB1<sup>high</sup>/IFNGR2<sup>low</sup> was 8 (95% CI: 6 – NA, number of events = 13) months, while that of 26 remaining patients was 10 (95% CI: 7 – 15, number of events = 24) months. The difference in survival outcome between these two groups was not statistically significant (Log-rank Chi-Square = 1.23,  $p$ -value = 0.267).

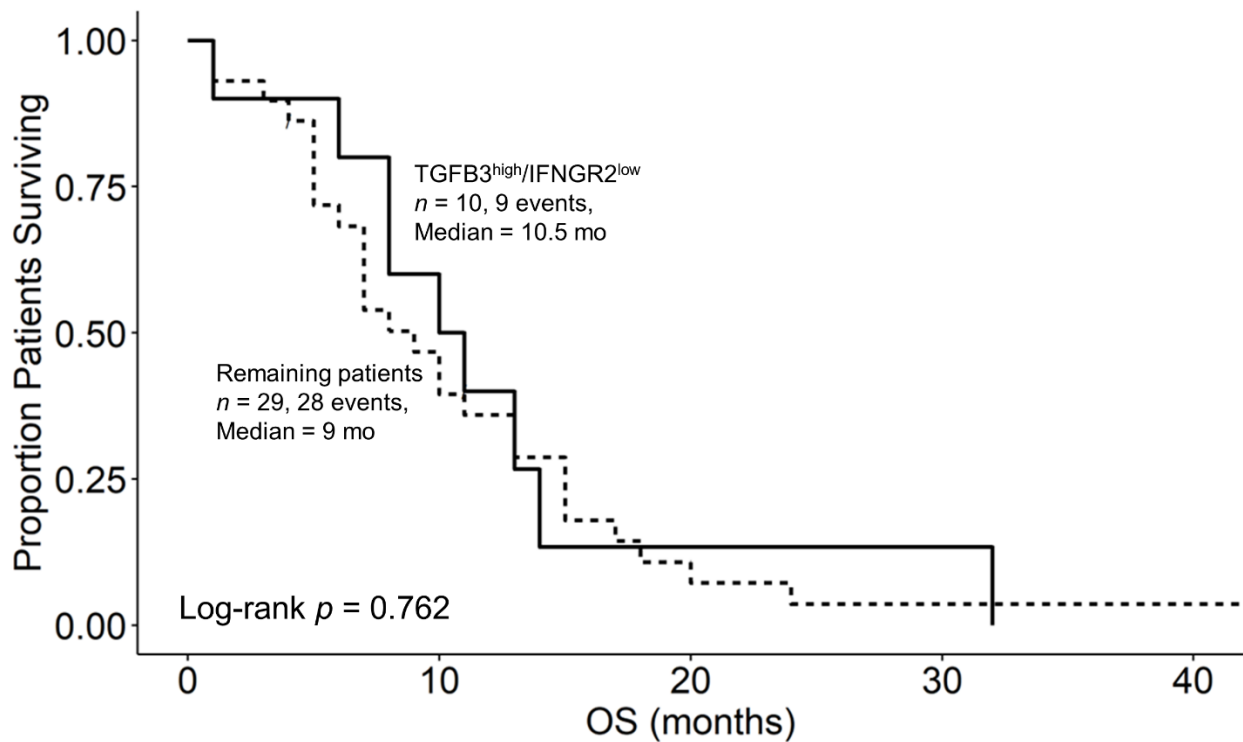

**Figure S5.** pbDMG patients with high levels of TGFB3 and low levels of IFNGR2 mRNA expression had no impact on OS times compared to the remaining patients.

We downloaded clinical metadata and RNA sequencing-based mRNA expression data for 39 patients diagnosed with pbDMG ([https://pedcbiportal.kidsfirstdrc.org/study/summary?id=openpbta%2Cpbta\\_all](https://pedcbiportal.kidsfirstdrc.org/study/summary?id=openpbta%2Cpbta_all)). The RSEM-determined TPM metric was used to calculate the percentiles of TGFB3 and IFNGR2 expression in 39 evaluable pbDMG patients (mRNA expression values were not recorded for 6 patients). Two patient groups were then formed based on their expression levels of TGFB3 and IFNGR2: high expression of TGFB3 mRNA and low expression of IFNGR2 (TGFB3<sup>high</sup>/IFNGR2<sup>low</sup>; higher than or equal to the 50<sup>th</sup> percentile of both TGFB3 and lower than 50<sup>th</sup> percentile for IFNGR2 ( $n=10$ )); and remaining patients ( $n=29$ ). OS curves were then compared between these groups to assess the survival impact of the combination of TGFB3 and IFNGR2 levels. The median OS time for 10 patients from the TGFB3<sup>high</sup>/IFNGR2<sup>low</sup> group was 10.5 months (95% CI: 8–NA, number of events = 9), while the median overall survival time for 29 patients in the remaining group was 9 months (95% CI: 7 – 15, number of events = 28). The difference in survival outcome between these two groups was not statistically significant (Log-rank Chi-Square = 0.091,  $p$ -value = 0.762).

**Table S1.** Clinical trials targeting pbDMG patients.

| NCT Number  | Title                                                                                                                                                                                         | Conditions                                                                                                                                                                      | Interventions                                                                    | Age          | Phases  |
|-------------|-----------------------------------------------------------------------------------------------------------------------------------------------------------------------------------------------|---------------------------------------------------------------------------------------------------------------------------------------------------------------------------------|----------------------------------------------------------------------------------|--------------|---------|
| NCT04196413 | GD2 CAR T Cells in Diffuse Intrinsic Pontine Gliomas(DIPG) & Spinal Diffuse Midline Glioma(DMG)                                                                                               | Glioma of Spinal Cord                                                                                                                                                           | Drug: GD2 CAR T cells                                                            | 2 to 50 yr   | Phase 1 |
|             |                                                                                                                                                                                               | Glioma of Brainstem                                                                                                                                                             | Drug: Fludarabine<br>Drug: Cyclophosphamide                                      |              |         |
| NCT04099797 | C7R-GD2.CAR T Cells for Patients With GD2-expressing Brain Tumors (GAIL-B)                                                                                                                    | Diffuse Intrinsic Pontine Glioma<br>High Grade Glioma<br>Embryonal Tumor<br>Ependymal Tumor                                                                                     | Genetic: (C7R)-GD2.CART cells                                                    | 1 to 21 yr   | Phase 1 |
| NCT05298995 | GD2-CAR T Cells for Pediatric Brain Tumours                                                                                                                                                   | Brain Tumor, Pediatric<br>Medulloblastoma, Childhood<br>Embryonal Tumor<br>High Grade Glioma<br>Diffuse Midline Glioma<br>Diffuse Intrinsic Pontine Glioma<br>Brain Tumor Adult | Biological: GD2-CART01 (iC9-GD2-CAR T-cells)                                     | 0.5 to 30 yr | Phase 1 |
| NCT04185038 | Study of B7-H3-Specific CAR T Cell Locoregional Immunotherapy for Diffuse Intrinsic Pontine Glioma/Diffuse Midline Glioma and Recurrent or Refractory Pediatric Central Nervous System Tumors | Central Nervous System Tumor                                                                                                                                                    | Biological: SCRI-CARB7H3(s); B7H3-specific chimeric antigen receptor (CAR) T cel | 1 to 26 yr   | Phase 1 |
|             |                                                                                                                                                                                               | Diffuse Intrinsic Pontine Glioma<br>Diffuse Midline Glioma                                                                                                                      |                                                                                  |              |         |

Ependymoma  
Medulloblastoma, Childhood  
Germ Cell Tumor  
Atypical Teratoid/Rhabdoid Tumor  
Primitive Neuroectodermal Tumor  
Choroid Plexus Carcinoma  
Pineoblastoma, Childhood  
Glioma

|             |                                                                                                    |                                                  |                                                                                  |            |         |
|-------------|----------------------------------------------------------------------------------------------------|--------------------------------------------------|----------------------------------------------------------------------------------|------------|---------|
| NCT02960230 | H3.3K27M Peptide Vaccine With Nivolumab for Children With Newly Diagnosed DIPG and Other Gliomas   | Diffuse Intrinsic Pontine Glioma                 | Biological: K27M peptide                                                         | 3 to 21 yr | Phase 1 |
|             |                                                                                                    | Glioma<br>Diffuse Midline Glioma, H3 K27M-Mutant | Drug: Nivolumab                                                                  |            | Phase 2 |
| NCT04749641 | Neoantigen Vaccine Therapy Against H3.3-K27M Diffuse Intrinsic Pontine Glioma                      | Diffuse Intrinsic Pontine Glioma                 | Biological: Histone H3.3-K27M Neoantigen Vaccine Therapy                         | ≥ 5 yr     | Phase 1 |
| NCT04808245 | A MulticENTER Phase I Peptide Vaccine Trial for the Treatment of H3-Mutated Gliomas                | Newly Diagnosed H3-mutated Glioma                | Drug: Tecentriq 1200 MG in 20 ML Injection<br>Biological: H3K27M peptide vaccine | > 18 yr    | Phase 1 |
| NCT01058850 | Phase I Rindopepimut After Conventional Radiation in Children w/ Diffuse Intrinsic Pontine Gliomas | Brain Cancer                                     | Biological: Rindopepimut                                                         | 3 to 18 yr | Phase 1 |
|             |                                                                                                    | Brain Stem Tumors<br>Pontine Tumors              |                                                                                  |            |         |

|             |                                                                                                                                                                  |                                                                         |                                                                                                                                                                                                                                                                                                                                        |                            |         |
|-------------|------------------------------------------------------------------------------------------------------------------------------------------------------------------|-------------------------------------------------------------------------|----------------------------------------------------------------------------------------------------------------------------------------------------------------------------------------------------------------------------------------------------------------------------------------------------------------------------------------|----------------------------|---------|
| NCT04978727 | A Pilot Study of SurVaxM in Children Progressive or Relapsed Medulloblastoma, High Grade Glioma, Ependymoma and Newly Diagnosed Diffuse Intrinsic Pontine Glioma | Medulloblastoma                                                         | Biological: SurVaxM for patients with relapsed or progressive MB, HGG or ependymoma ages $\geq 10$ and $\leq 21$ years                                                                                                                                                                                                                 | $\geq 10$ and $\leq 21$ yr | Phase 1 |
|             |                                                                                                                                                                  | Glioblastoma Multiforme                                                 |                                                                                                                                                                                                                                                                                                                                        |                            |         |
|             |                                                                                                                                                                  | Anaplastic Astrocytoma                                                  | Biological: SurVaxM for patients with relapsed or progressive MB, HGG or ependymoma ages $\geq 1$ and $< 10$ years                                                                                                                                                                                                                     | $\geq 1$ and $< 10$ yr     |         |
|             |                                                                                                                                                                  | High-grade Astrocytoma NOS                                              |                                                                                                                                                                                                                                                                                                                                        |                            |         |
|             |                                                                                                                                                                  | Anaplastic Oligodendroglioma                                            | Biological: SurVaxM for patients with non-relapsed DIPG post radiation-therapy ages $\geq 1$ and $\leq 21$ years                                                                                                                                                                                                                       | $\geq 1$ and $\leq 21$ yr  |         |
|             |                                                                                                                                                                  | Anaplastic Ependymoma<br>Ependymoma<br>Diffuse Intrinsic Pontine Glioma |                                                                                                                                                                                                                                                                                                                                        |                            |         |
| NCT04943848 | rHSC-DIPGVax Plus Checkpoint Blockade for the Treatment of Newly Diagnosed DIPG and DMG                                                                          | Diffuse Intrinsic Pontine Glioma                                        | Biological: rHSC-DIPGVax                                                                                                                                                                                                                                                                                                               | 0.5 to 18 yr               | Phase 1 |
|             |                                                                                                                                                                  | Diffuse Midline Glioma, H3 K27M-Mutant                                  | Drug: Balstilimab<br><br>BALSTILIMAB is a human monoclonal antibody that targets programmed cell death 1 (PD1)<br><br>Drug: Zalifrelimab<br><br>ZALIFRELIMAB is a human monoclonal immunoglobulin G1k subclass (IgG1k) antibody that specifically recognizes cytotoxic T lymphocyte-associated protein 4 (CTLA-4, also known as CD152) |                            |         |
| NCT03330197 | A Study of Ad-RTS-hIL-12 + Veledimex in Pediatric Subjects With Brain Tumors Including DIPG                                                                      | Pediatric Brain Tumor                                                   | Biological: Ad-RTS-hIL-12                                                                                                                                                                                                                                                                                                              | $\leq 21$ yr               | Phase 1 |
|             |                                                                                                                                                                  | Diffuse Intrinsic Pontine Glioma                                        | Drug: Oral Veledimex - Arm 1 (Pediatric Brain Tumor)                                                                                                                                                                                                                                                                                   |                            | Phase 2 |

|             |                                                                                                                                                                                                |                                                                                                                                                                                                                                                                                                                                                                                                      |                                                                                                            |             |                        |
|-------------|------------------------------------------------------------------------------------------------------------------------------------------------------------------------------------------------|------------------------------------------------------------------------------------------------------------------------------------------------------------------------------------------------------------------------------------------------------------------------------------------------------------------------------------------------------------------------------------------------------|------------------------------------------------------------------------------------------------------------|-------------|------------------------|
| NCT03178032 | Oncolytic Adenovirus, DNX-2401, for Naive Diffuse Intrinsic Pontine Gliomas                                                                                                                    | Brainstem Glioma<br>Neoadjuvant Therapy                                                                                                                                                                                                                                                                                                                                                              | Biological: DNX-2401<br><br>Brain infusion of the virus through the cerebellar peduncle                    | 1 to 18 yr  | Phase 1                |
| NCT02444546 | Wild-Type Reovirus in Combination With Sargramostim in Treating Younger Patients With High-Grade Relapsed or Refractory Brain Tumors                                                           | Childhood Astrocytoma<br><br>Childhood Atypical Teratoid/Rhabdoid Tumor<br><br>Diffuse Intrinsic Pontine Glioma<br><br>Glioma<br><br>Recurrent Childhood Anaplastic Oligodendroglioma<br><br>Recurrent Childhood Brain Neoplasm<br><br>Recurrent Childhood Glioblastoma<br><br>Recurrent Childhood Medulloblastoma<br><br>Recurrent Primitive Neuroectodermal Tumor<br><br>Refractory Brain Neoplasm | Other: Laboratory Biomarker Analysis<br><br>Biological: Sargramostim<br><br>Biological: Wild-type Reovirus | 10 to 21 yr | Phase 1                |
| NCT04758533 | Clinical Trial to Assess the Safety and Efficacy of AloCELYVIR With Newly Diagnosed Diffuse Intrinsic Pontine Glioma (DIPG) in Combination With Radiotherapy or Medulloblastoma in Monotherapy | Diffuse Intrinsic Pontine Glioma<br><br>Medulloblastoma, Childhood, Recurrent                                                                                                                                                                                                                                                                                                                        | Biological: AloCELYVIR<br><br>Mesenchymal allogenic cells + ICOVIR-5: 500.000 cells/kg                     | 1 to 21 yr  | Phase 1<br><br>Phase 2 |

|             |                                                                                                                                                                                                       |                                                    |                                                                              |            |                    |
|-------------|-------------------------------------------------------------------------------------------------------------------------------------------------------------------------------------------------------|----------------------------------------------------|------------------------------------------------------------------------------|------------|--------------------|
| NCT05096481 | PEP-CMV Vaccine Targeting CMV Antigen to Treat Newly Diagnosed Pediatric HGG and DIPG and Recurrent Medulloblastoma                                                                                   | High Grade Glioma                                  | Biological: PEP-CMV                                                          | 3 to 25 yr | Phase 2            |
|             |                                                                                                                                                                                                       | Diffuse Intrinsic Pontine Glioma                   | Drug: Temozolomide                                                           |            |                    |
|             |                                                                                                                                                                                                       | Recurrent Medulloblastoma                          | Biological: Tetanus Diphtheria Vaccine                                       |            |                    |
| NCT01952769 | Anti PD1 Antibody in Diffuse Intrinsic Pontine Glioma                                                                                                                                                 | DIPG                                               | Biological: MDV9300                                                          | 3 to 21 yr | Phase 1<br>Phase 2 |
|             |                                                                                                                                                                                                       |                                                    | 1. Evaluation of MDV9300 and radiation-                                      |            |                    |
|             |                                                                                                                                                                                                       |                                                    | 2. Evaluation of MDV9300 and cyclophosphamide<br>Other Names:<br>pidilizumab |            |                    |
| NCT02359565 | Pembrolizumab in Treating Younger Patients With Recurrent, Progressive, or Refractory High-Grade Gliomas, Diffuse Intrinsic Pontine Gliomas, Hypermutated Brain Tumors, Ependymoma or Medulloblastoma | Constitutional Mismatch Repair Deficiency Syndrome | Biological: Pembrolizumab                                                    | 1 to 30 yr | Phase 1            |
|             |                                                                                                                                                                                                       | Lynch Syndrome                                     |                                                                              |            |                    |
|             |                                                                                                                                                                                                       | Malignant Glioma                                   |                                                                              |            |                    |
|             |                                                                                                                                                                                                       | Recurrent Brain Neoplasm                           |                                                                              |            |                    |
|             |                                                                                                                                                                                                       | Recurrent Childhood Ependymoma                     |                                                                              |            |                    |
|             |                                                                                                                                                                                                       | Recurrent Diffuse Intrinsic Pontine Glioma         |                                                                              |            |                    |
|             |                                                                                                                                                                                                       | Recurrent Medulloblastoma                          |                                                                              |            |                    |
|             |                                                                                                                                                                                                       | Refractory Brain Neoplasm                          |                                                                              |            |                    |
|             |                                                                                                                                                                                                       | Refractory Diffuse Intrinsic Pontine Glioma        |                                                                              |            |                    |
|             |                                                                                                                                                                                                       | Refractory Ependymoma                              |                                                                              |            |                    |
|             |                                                                                                                                                                                                       | Refractory Medulloblastoma                         |                                                                              |            |                    |

|             |                                                                                                                                                                                                                                            |                                         |                                                                                                     |                                |         |
|-------------|--------------------------------------------------------------------------------------------------------------------------------------------------------------------------------------------------------------------------------------------|-----------------------------------------|-----------------------------------------------------------------------------------------------------|--------------------------------|---------|
| NCT03690869 | REGN2810 in Pediatric Patients With Relapsed, Refractory Solid, or Central Nervous System (CNS) Tumors and Safety and Efficacy of REGN2810 in Combination With Radiotherapy in Pediatric Patients With Newly Diagnosed or Recurrent Glioma | Relapsed Solid Tumor                    | Drug: cemiplimab (monotherapy)                                                                      | 0 to <18 yr (Phase 1)          | Phase 1 |
|             |                                                                                                                                                                                                                                            | Refractory Solid Tumor                  | To be administered intravenously as monotherapy in Phase 1                                          | ≥3 and ≤25 yr (Efficacy Phase) | Phase 2 |
|             |                                                                                                                                                                                                                                            | Relapsed Central Nervous System Tumor   | Other Names:                                                                                        |                                |         |
|             |                                                                                                                                                                                                                                            | Refractory Central Nervous System Tumor | REGN2810                                                                                            |                                |         |
|             |                                                                                                                                                                                                                                            | Diffuse Intrinsic Pontine Glioma        | Libtayo                                                                                             |                                |         |
|             |                                                                                                                                                                                                                                            | High Grade Glioma                       | Drug: cemiplimab (maintenance)                                                                      |                                |         |
|             |                                                                                                                                                                                                                                            |                                         | To be administered intravenously in combination with radiation and then used as maintenance therapy |                                |         |
|             |                                                                                                                                                                                                                                            |                                         | Other Names:                                                                                        |                                |         |
|             |                                                                                                                                                                                                                                            |                                         | REGN2810                                                                                            |                                |         |
|             |                                                                                                                                                                                                                                            |                                         | Libtayo                                                                                             |                                |         |
|             |                                                                                                                                                                                                                                            |                                         | Radiation: Conventional or hypofractionated                                                         |                                |         |
|             |                                                                                                                                                                                                                                            |                                         | Combined with cemiplimab IV administration                                                          |                                |         |
|             |                                                                                                                                                                                                                                            |                                         | Radiation: Re-irradiation                                                                           |                                |         |
|             |                                                                                                                                                                                                                                            |                                         | Combined with cemiplimab IV administration                                                          |                                |         |

---

**Table S2.** Patient characteristics for pbDMG, High Grade Glioma (HGG) and Low Grade Glioma (LGG) patients

| Variable                       | pbDMG                                           |                 | HGG                                             |                 | LGG                                             |                 |
|--------------------------------|-------------------------------------------------|-----------------|-------------------------------------------------|-----------------|-------------------------------------------------|-----------------|
|                                | Mean/Median(Range) or<br><i>n</i> (% evaluable) |                 | Mean/Median(Range) or<br><i>n</i> (% evaluable) |                 | Mean/Median(Range) or<br><i>n</i> (% evaluable) |                 |
| <b>Age (yrs)</b>               |                                                 |                 |                                                 |                 |                                                 |                 |
| Mean±SEM / Median<br>(Range)   | 7.38 ± 0.59                                     | 7 (2 – 18)      | 9.26 ± 0.41                                     | 9 (0 – 25)      | 8.09 ± 0.28                                     | 8 (0 – 31)      |
| <i>n</i>                       | 45                                              |                 | 171                                             |                 | 404                                             |                 |
| <b>Fraction Genome Altered</b> |                                                 |                 |                                                 |                 |                                                 |                 |
| Mean±SEM / Median<br>(Range)   | 0.22 ± 0.04                                     | 0.16 (0 – 0.81) | 0.32 ± 0.02                                     | 0.26 (0 – 0.92) | 0.16 ± 0.01                                     | 0.07 (0 – 0.99) |
| <i>n</i>                       | 25                                              |                 | 101                                             |                 | 363                                             |                 |
| <b>Mutation Count</b>          |                                                 |                 |                                                 |                 |                                                 |                 |
| Mean±SEM / Median<br>(Range)   | 44 ± 19                                         | 23 (2 – 499)    | 485 ± 217                                       | 32 (3 – 12800)  | 23 ± 8                                          | 9 (1 – 2677)    |
| <i>n</i>                       | 25                                              |                 | 101                                             |                 | 362                                             |                 |
| <b>Sex</b>                     |                                                 |                 |                                                 |                 |                                                 |                 |
| Female                         | 29(66%)                                         |                 | 85(49%)                                         |                 | 183(45%)                                        |                 |
| Male                           | 15(34%)                                         |                 | 88(51%)                                         |                 | 222(55%)                                        |                 |
| <b>Ethnicity</b>               |                                                 |                 |                                                 |                 |                                                 |                 |
| Hispanic or Latino             | 5(13%)                                          |                 | 27(19%)                                         |                 | 43(11%)                                         |                 |
| Not Hispanic or Latino         | 35(87%)                                         |                 | 114(81%)                                        |                 | 336(89%)                                        |                 |
| <b>Race</b>                    |                                                 |                 |                                                 |                 |                                                 |                 |
| All Other                      | 9(20%)                                          |                 | 49(28%)                                         |                 | 81(20%)                                         |                 |
| Asian                          | 4(9%)                                           |                 | 9(5%)                                           |                 | 8(2%)                                           |                 |
| Black or African American      | 4(9%)                                           |                 | 10(6%)                                          |                 | 27(7%)                                          |                 |
| White                          | 28(62%)                                         |                 | 106(61%)                                        |                 | 289(71%)                                        |                 |
